# Supplementary material for: Does mass chloroquine treatment have any role in the elimination of Plasmodium vivax ?
Source: Springer Nature journal article supplement (doi:10.1186/s12936-025-05399-2), 2025-05-26
Supplement: MOESM1 [file 12936_2025_5399_MOESM1_ESM.pdf]

**Supplementary information.** To model the hypnozoite burden, we draw on the within-host framework constructed in [15]. We adopt the simplest exponential clock model, whereby each hypnozoite activates independently at constant rate  $\eta$  [13, 15]. Each infective bite is modelled to inoculate a geometrically-distributed sporozoite batch of mean size  $\nu$ . A sporozoite either undergoes immediate development with probability  $(1 - p_{\text{rel}})$  to give rise to primary infection or it forms a hypnozoite that is destined to activate at a later time (we have re-parametrised this model to ignore the unobservable contribution of hypnozoite death). To capture population heterogeneity, we allow the force of inoculation in the population to follow a Gamma-distribution, with shape parameter  $\kappa$  and mean  $\bar{\lambda}$  [19].

Under a constant force of infection or infective bite rate  $\lambda$ , the hypnozoite burden at stationarity follows a negative binomial distribution with mean  $\lambda\nu p_{\text{rel}}/\eta$  and shape parameter  $\lambda/\eta$  [12]. Each round of chloroquine MDA is assumed to confer  $T$  days of chemoprotection. If an individual receives  $m$  rounds of chloroquine, this amounts to a consecutive duration  $mT$  of complete prophylactic antimalarial protection. During this period, each hypnozoite may activate spontaneously with probability  $(1 - e^{-\lambda mT})$ , but the hypnozoite progeny will be unable to establish a blood-stage infection. Assuming that additional hypnozoites cannot be acquired during this period of chemoprotection (i.e. that transmission of *P. vivax* has also been interrupted completely), we can apply the law of total expectation to show that the size of the hypnozoite reservoir  $H_m(\lambda)$  following  $m$  bouts of treatment is negative binomial with mean  $\lambda\mu e^{-\eta mT}/\eta$  and shape parameter  $\lambda/\eta$ .

By applying the law of total expectation, we can show that the within-host hypnozoite burden  $H_m$  after  $m$  bouts of treatment, accommodating heterogeneity, has probability generating function (PGF)

$$\begin{aligned} \mathbb{E}[z^{H_m}] &= \int_0^\infty \underbrace{(1 + \nu p_{\text{rel}} e^{-\eta mT} (1 - z))^{-\frac{u}{\eta}}}_{\text{PGF at stationarity under constant FOI } u} \cdot \underbrace{\frac{1}{\Gamma(\kappa)} \left(\frac{\kappa}{\bar{\lambda}}\right)^\kappa u^{\kappa-1} e^{-\frac{\kappa u}{\bar{\lambda}}}}_{\text{probability density (Gamma distribution) for FOI } u} du \\ &= \left(1 + \frac{\bar{\lambda}}{\eta\kappa} \log(1 + \nu p_{\text{rel}} e^{-\eta mT} (1 - z))\right)^{-\kappa}. \end{aligned}$$

Now, we consider a closed population of  $N$  individuals with 100% adherence to an MDA regimen spanning  $m$  bouts of treatment. Assuming that the hypnozoite burden of each individual can be modelled independently, the population-wise hypnozoite burden  $H_m(N)$  after MDA has PGF

$$\mathbb{E}[z^{H_m(N)}] = \mathbb{E}[z^{H_m}]^N = \left(1 + \frac{\bar{\lambda}}{\eta\kappa} \log(1 + \nu p_{\text{rel}} e^{-\eta mT} (1 - z))\right)^{-\kappa N}. \quad (1)$$

We can recover the probability mass function (PMF) of  $H_m(N)$  from the PGF (1) by computing

$$P(H_m(N) = n) = \frac{1}{n!} \frac{d^n}{dz^n} \mathbb{E}[z^{H_m(N)}] \Big|_{z=0}.$$

This can be performed directly using the function `Series` in Mathematica. To obtain an analytic expression, we write the PGF (1) in the form

$$\mathbb{E}[z^{H_m(N)}] = f(g(z))$$

where

$$\begin{aligned} f(z) &= x^{-\kappa N} \\ g(z) &= 1 + \frac{\bar{\lambda}}{\eta\kappa} \log(1 + \nu p_{\text{rel}} e^{-\eta m T} (1 - z)). \end{aligned}$$

Using Faa di Bruno's formula as in [12], it then follows that

$$\begin{aligned} P(H_m(N) = n) &= \frac{1}{n!} \sum_{\ell=0}^n f^{(\ell)}(g(0)) \cdot B_{n,\ell}(g^{(1)}(0), \dots, g^{(n-\ell+1)}(0)) \\ &= \sum_{\ell=0}^n (-1)^\ell \frac{\ell!}{n!} \binom{\kappa N + \ell - 1}{\ell} \left[ 1 + \frac{\bar{\lambda}}{\eta\kappa} \log(1 + \nu p_{\text{rel}} e^{-\eta m T}) \right]^{-(\kappa N + \ell)} \\ &\quad B_{n,\ell} \left( -\frac{\bar{\lambda}}{\eta\kappa} \frac{\nu p_{\text{rel}} e^{-\eta m T}}{\nu p_{\text{rel}} e^{-\eta m T} + 1}, \dots, -\frac{\bar{\lambda}}{\eta\kappa} (n - \ell)! \left( \frac{\nu p_{\text{rel}} e^{-\eta m T}}{\nu p_{\text{rel}} e^{-\eta m T} + 1} \right)^{n - \ell + 1} \right) \end{aligned}$$

where  $B_{n,k}$  denotes the partial Bell polynomial. Using standard identities, we obtain

$$\begin{aligned} P(H_m(N) = n) &= \sum_{\ell=0}^n \left\{ \frac{\ell!}{n!} \begin{bmatrix} n \\ \ell \end{bmatrix} \binom{\kappa N + \ell - 1}{\ell} \left( \frac{\bar{\lambda}}{\eta\kappa} \right)^\ell \left( \frac{\nu p_{\text{rel}} e^{-\eta m T}}{\nu p_{\text{rel}} e^{-\eta m T} + 1} \right)^n \right. \\ &\quad \left. \left[ 1 + \frac{\bar{\lambda}}{\eta\kappa} \log(1 + \nu p_{\text{rel}} e^{-\eta m T}) \right]^{-(\kappa N + \ell)} \right\} \end{aligned}$$

where  $\begin{bmatrix} n \\ \ell \end{bmatrix}$  denotes an unsigned Stirling number of the first kind.

We parametrise this model based on the posterior median estimates  $\eta = 1/171 \text{ day}^{-1}$  and  $\nu p_{\text{rel}} = 2.7$  from [15], with  $\kappa = 1.15$  such that the 20% of individuals subject to the highest transmission intensity are collectively expected to experience 50% of infective bites. We assume each round of CQ MDA yields  $T = 30$  days of chemoprotection.
